# Supplementary material for: Metabolic signatures of regulation by phosphorylation and acetylation
Source: PubMed Central journal article supplement — iScience. 2022 Jan 1;25(1):103730. doi: 10.1016/j.isci.2021.103730 (PMC8762462; doi:10.1016/j.isci.2021.103730), 2022-01-01
Supplement: mmc1.pdf [file mmc1.pdf]

**iScience, Volume 25**

**Supplemental information**

**Metabolic signatures of regulation  
by phosphorylation and acetylation**

**Kirk Smith, Fangzhou Shen, Ho Joon Lee, and Sriram Chandrasekaran**

1

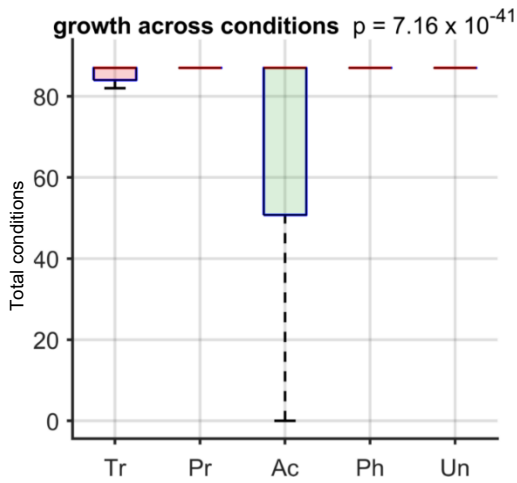

2

3 Figure S1. Distribution of regulation based on gene essentiality across 87 different conditions, Related to Figure  
4 1. These conditions comprise 56 different carbon sources including glucose, and 31 different nitrogen sources  
5 including ammonium ions. The total number of conditions in which each gene deletion was viable was calculated.  
6 This total number was then compared between targets of each regulatory mechanism. The box plots show that  
7 acetylation preferentially regulates the genes that impact growth across the 87 conditions. The box plot whiskers  
8 extend to the 99.3<sup>rd</sup> percentile of each distribution. The ANOVA p-value comparing the means is  $7.1 \times 10^{-41}$ .

9

10

11

12

13

14

15

16

17

18

19

20

21

22

23

24

25

26

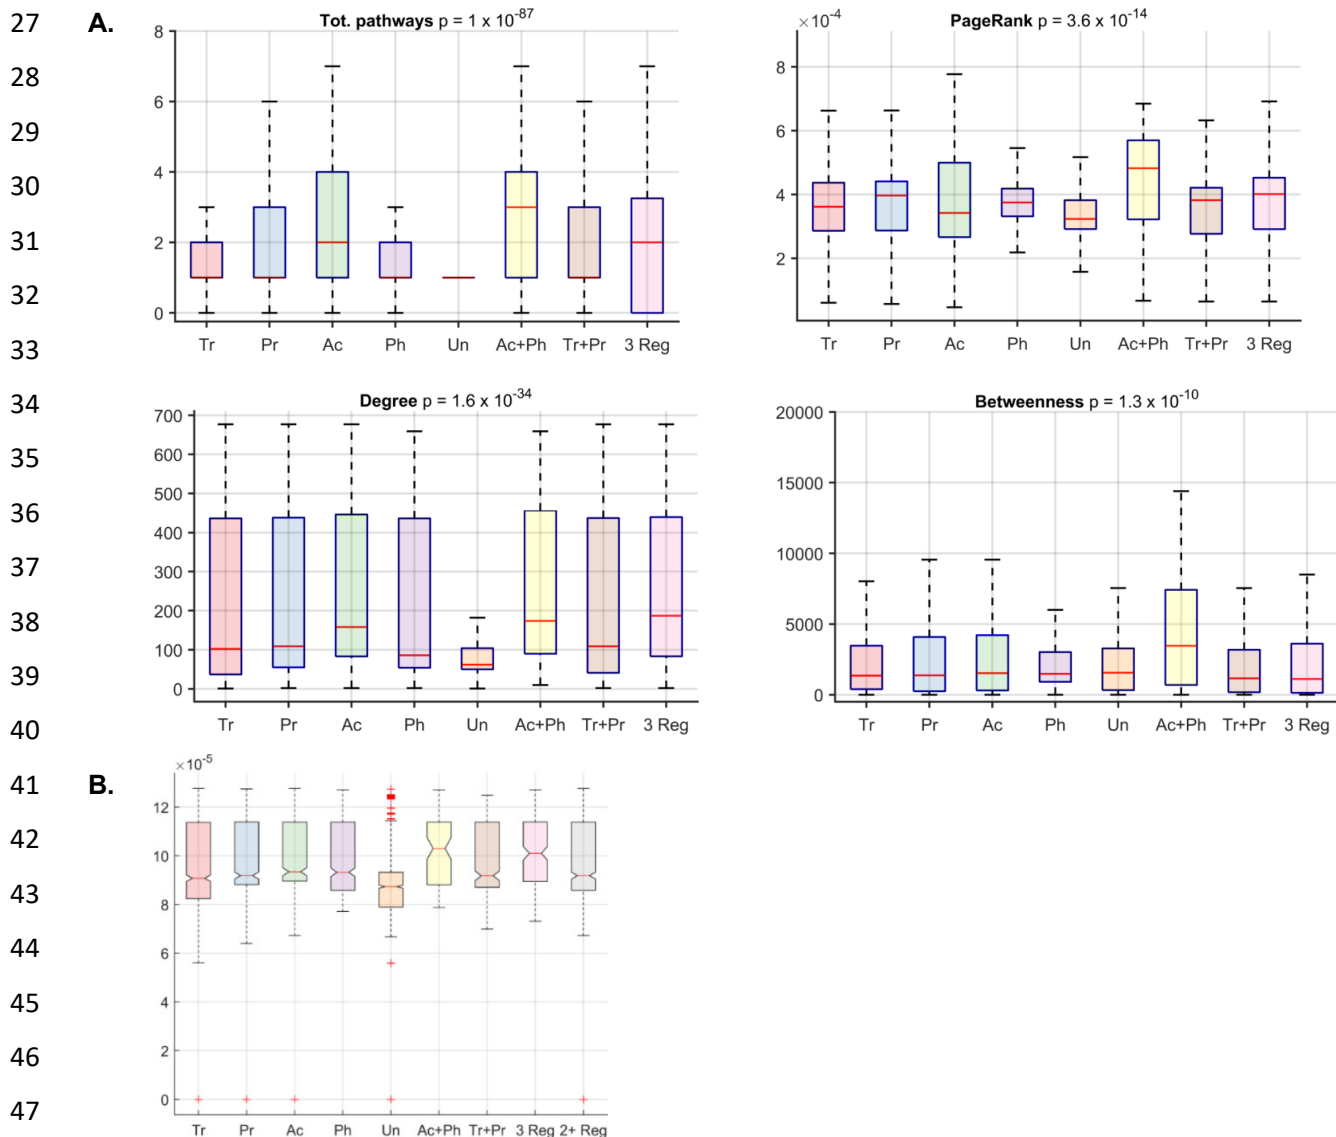

48 **Figure S2. Distribution of regulation based on topological properties of each reaction, Related to Figure 1. A.** Four  
 49 different topological properties are shown in the box plots - the total number of annotated pathways each reaction  
 50 participates (Tot. pathways), the number of times each reaction is traversed during a random walk between  
 51 reactions in the network (PageRank), the total number of connected reactions (Degree) and the number of times  
 52 each reaction appears on a shortest path between two reactions (Betweenness). These show that reactions that  
 53 are regulated by any mechanism have a higher connectivity compared to those that are unregulated or regulated  
 54 by unknown mechanisms. Furthermore, reactions regulated by both acetylation and phosphorylation had the  
 55 highest connectivity across all metrics. The ANOVA p-value comparing the means is provided in the title.  
 56 (Abbreviations: regulation by both transcription and post-transcription (Tr + Pr), both acetylation and  
 57 phosphorylation (Ac + Ph), at least 3 regulators (3 Reg), and Unknown regulation (Un)). **B.** Demonstration of  
 58 robustness of topological analysis. Highly connected metabolites (ATP ADP AMP NADH NAD) were removed  
 59 from the yeast model prior to the calculation of topological parameters. The box plots compare the properties of  
 60 enzymes regulated by transcription (Tr), post-transcription (Pr), acetylation (Ac), phosphorylation (Ph), both  
 61 transcription and post-transcription (Tr + Pr), both acetylation and phosphorylation (Ac + Ph), or at least 3  
 62 regulators (3 Reg). Reactions regulated by both acetylation and phosphorylation had the highest connectivity as  
 63 measured by the Closeness. The ANOVA p-value comparing the means is  $3e-46$  for closeness,  $2e-29$  for degree  
 64 (not shown) and  $5e-15$  for pagerank (not shown).

65

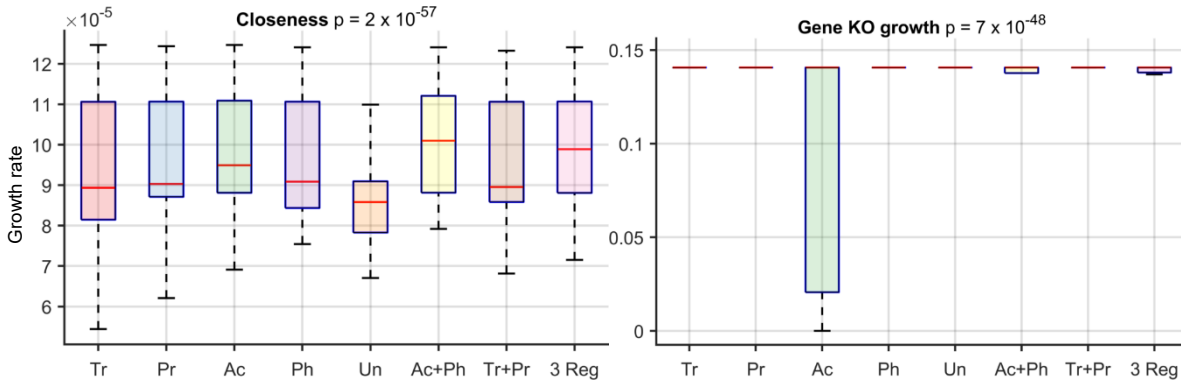

66

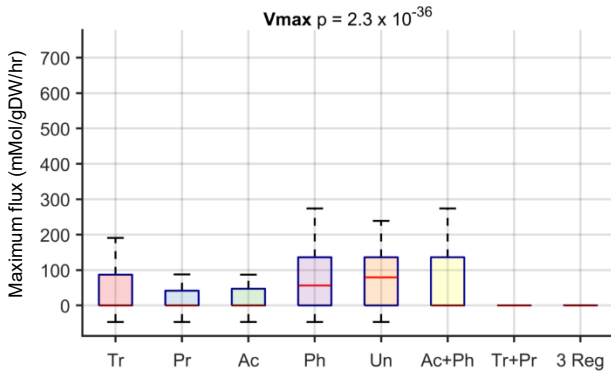

67

68 **Figure S3. Properties of reactions regulated by multiple mechanisms, Related to Figure 1.** The box plots compare  
69 the properties of enzymes regulated by transcription, post-transcription, acetylation, phosphorylation with those  
70 regulated by both transcription and post-transcription (Tr + Pr), both acetylation and phosphorylation (Ac + Ph), or  
71 at least 3 regulators (3 Reg). This set of combinations among regulators was chosen as both acetylation and  
72 phosphorylation are PTMs, and the transcriptome and proteome of yeast cells show significant correlation.  
73 Reactions regulated by both acetylation and phosphorylation had the highest connectivity as measured by the  
74 inverse sum of the distance from a reaction to all other reactions in the network (Closeness). Apart from  
75 connectivity, reactions regulated by two different mechanisms did not share properties of reactions regulated by  
76 each individual mechanism. For example, reactions regulated by acetylation and phosphorylation were not likely  
77 to be essential or have high maximum flux. The ANOVA p-value comparing the means is provided in the title.

78

79

80

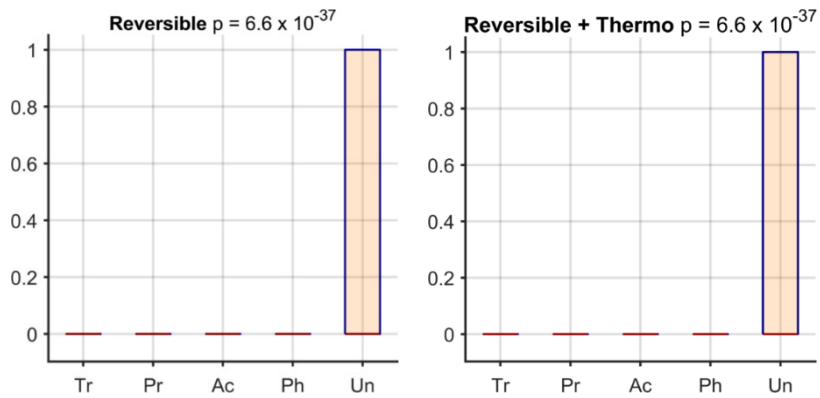

81

82 **Figure S4. Distribution of regulation based on reaction reversibility, Related to Figure 1.** Reversible reactions were  
 83 highly likely to be not regulated by any of the four mechanisms. The left panel compares the distribution of  
 84 regulation of reversible reactions based on the annotation from the Yeast 7 model (reversible reactions are set to  
 85 1 and irreversible reactions are set to 0). The panel on the right uses an updated list based on thermodynamic  
 86 analysis of the Yeast metabolic model by Martinez *et al* [49].

87

88

89

90

91

92

93

94

95

96

97

98

99

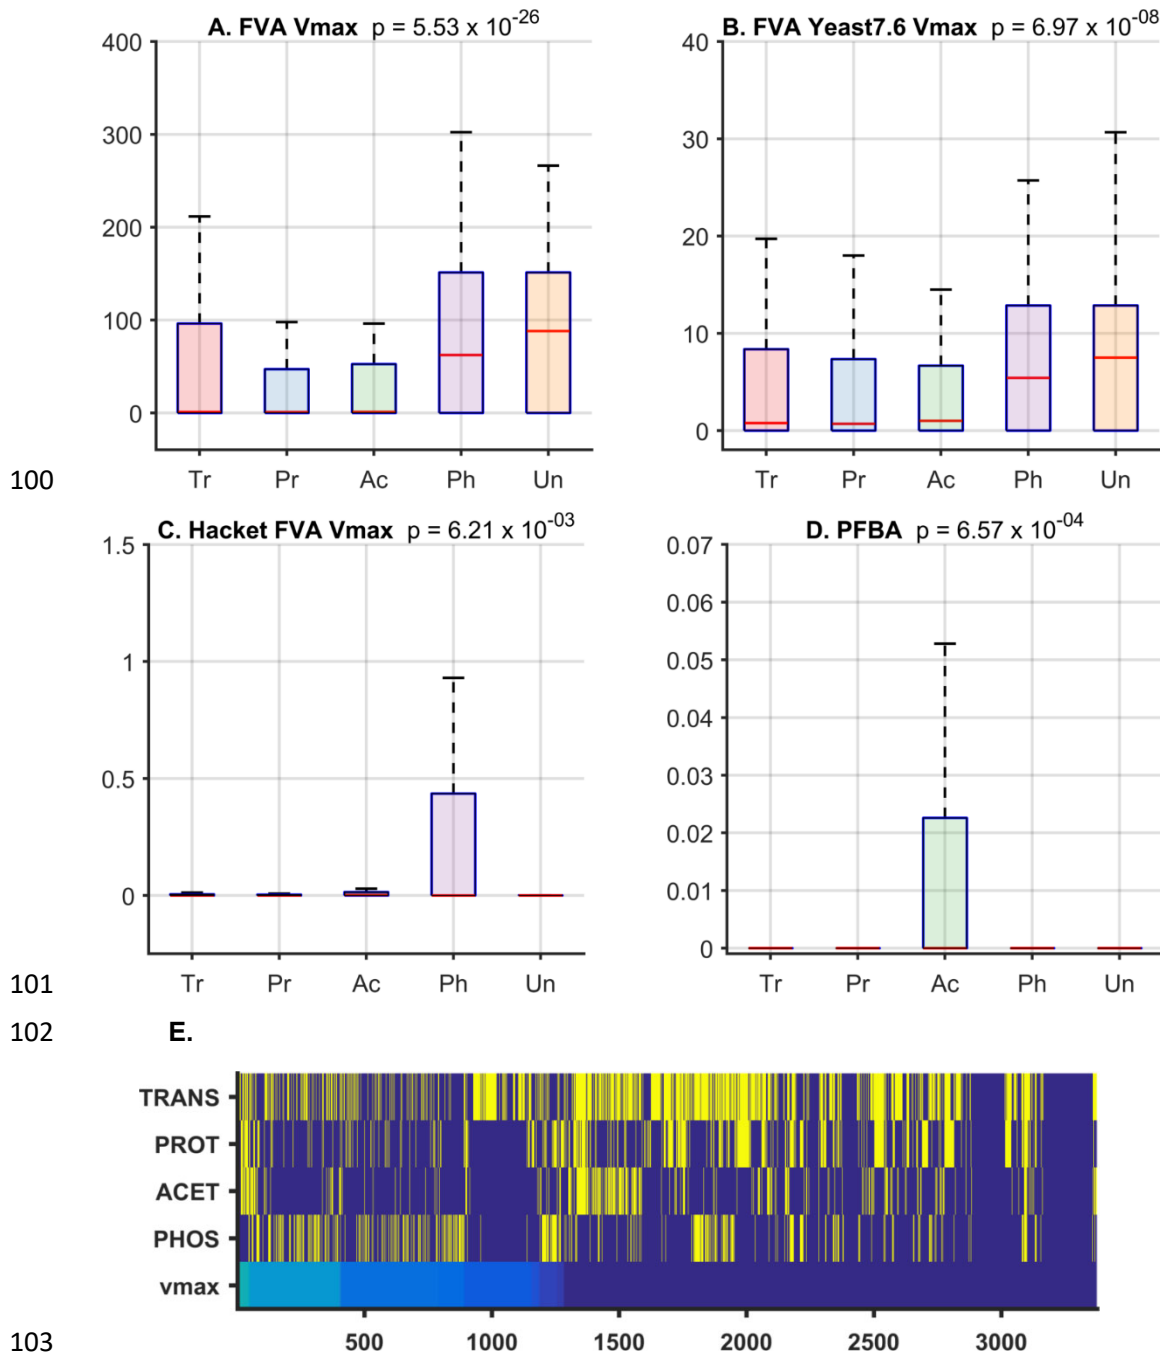

104 Figure S5. Distribution of regulation based on magnitude of maximum possible flux (mmol/gDW/hr) through each  
 105 reaction, Related to Figure 1. The plots compare the distribution of regulation using flux calculated using various  
 106 methods and models. The ANOVA p-value comparing the means is provided in the panel title of each plot. These  
 107 results show that phosphorylated reactions are highly enriched among those reactions with high maximum flux. **A.**  
 108 Maximum flux through each reaction was calculated using FVA using the Yeast 7 model without assuming that  
 109 cells maximize their biomass (the default objective in FVA and FBA). The box plots compare the maximum flux  
 110 value of reactions regulated by each mechanism. **B.** Maximum flux through each reaction was calculated using  
 111 FVA without assuming that cells maximize their biomass using the Yeast 7.6 model (Yeast 7 model was used for  
 112 all analyses). **C.** The flux through the model was first fit to the experimentally inferred flux data from Hackett *et*  
 113 *a*[21]. The maximum flux through all reactions was then determined using FVA. **D.** The flux through each  
 114 reaction was inferred from Parsimonious FBA (PFBA). Note that PFBA does not provide the maximum flux but the

115 flux value that minimizes the sum of flux through all reactions while maximizing the biomass objective. Hence it  
116 does not reveal any futile cycles or redundancy in the network. **E.** The heatmap shows the distribution of  
117 regulation based on magnitude of maximum possible flux ( $V_{max}$ ) through of each reaction. Reactions are sorted  
118 based on  $V_{max}$  inferred from FVA. The columns correspond to each reaction-gene pair. Those that are regulated  
119 by each mechanism are shown in yellow, while those that are not regulated by a specific mechanism are in blue.

120

121

122

123

124

125

126

127

128

129

130

131

132

133

134

135

136

137

138

139

140

141

142

143

144

145

146

147

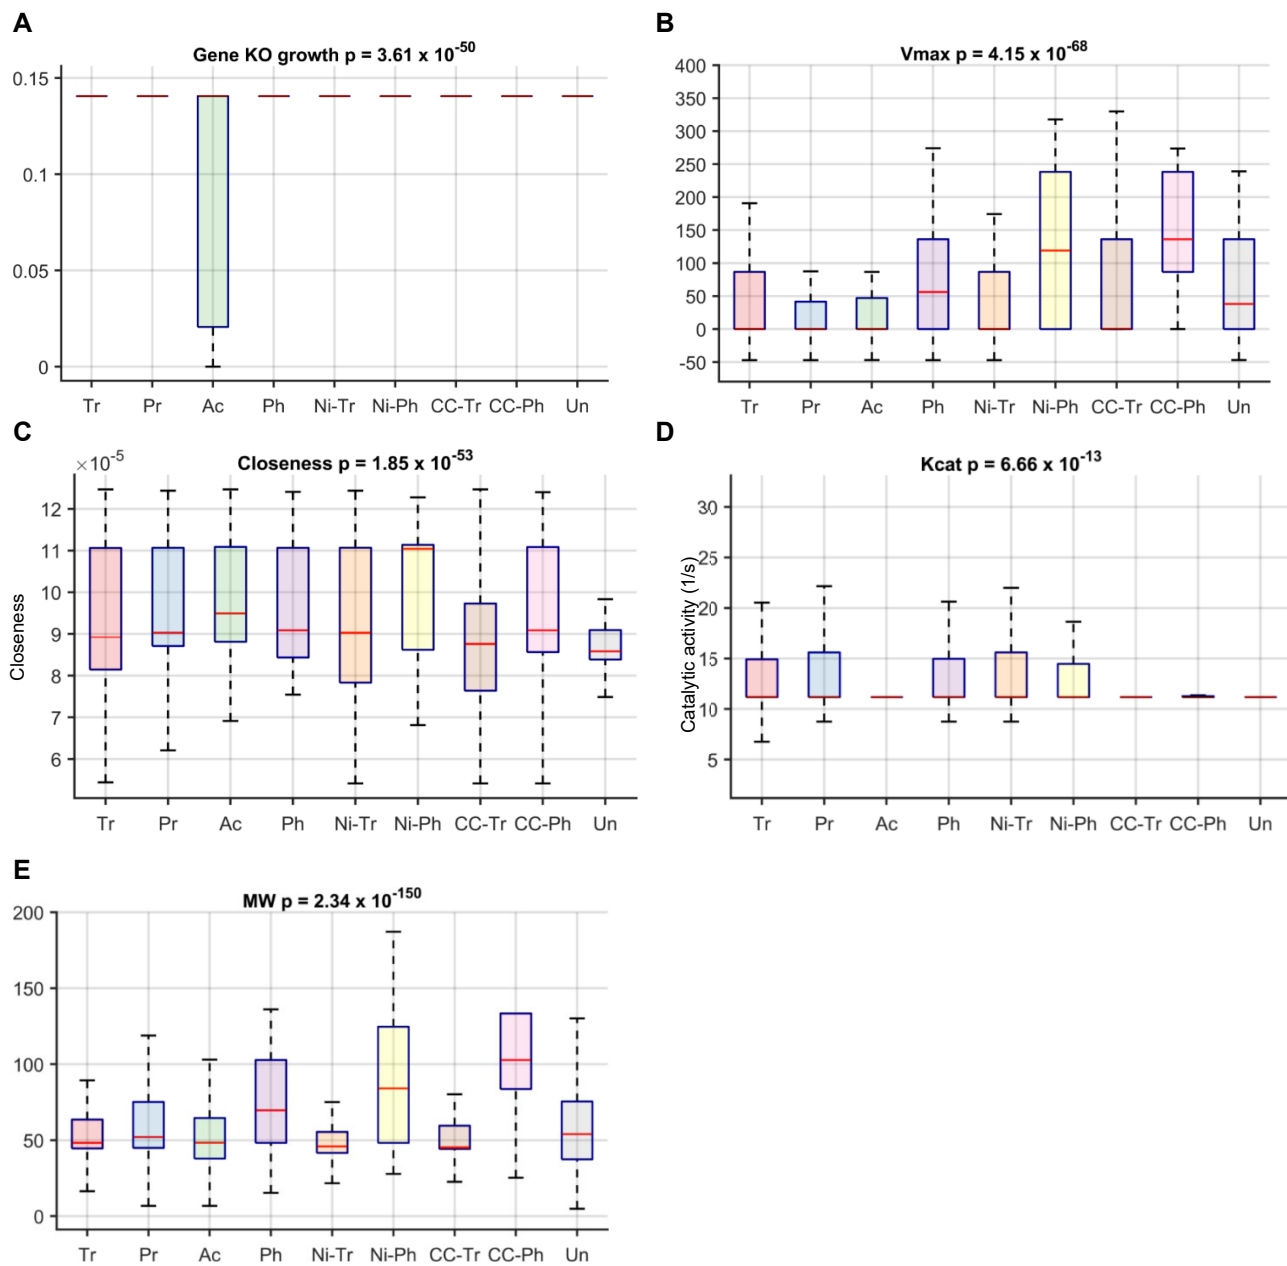

148 Figure S6. Comparison of the properties of enzymes in yeast regulated by each mechanism during the cell cycle  
 149 (CC-Tr, CC-Ph) and nitrogen starvation (Ni-Tr, Ni-Ph), Related to Figure 1. Data from stationary phase conditions  
 150 (transcription (Tr), post-transcription (Pr), acetylation (Ac), phosphorylation (Ph) or Unknown regulation (Un)) are  
 151 shown for comparison. Similar to stationary phase, enzymes that impact growth when knocked out are likely to be  
 152 acetylated (A), enzymes that catalyze reactions with high flux are likely to be regulated through phosphorylation in  
 153 all three conditions (B), enzymes that are highly connected are likely to be regulated by one of the four  
 154 mechanisms (C). No consistent difference across datasets was observed in regulation based on the enzyme  
 155 catalytic activity (kcat) of the target enzyme (D) and enzymes regulated by phosphorylation on average tend to  
 156 have high molecular weight (E). The Anova p-value comparing the differences in means is shown in the title.

157  
 158



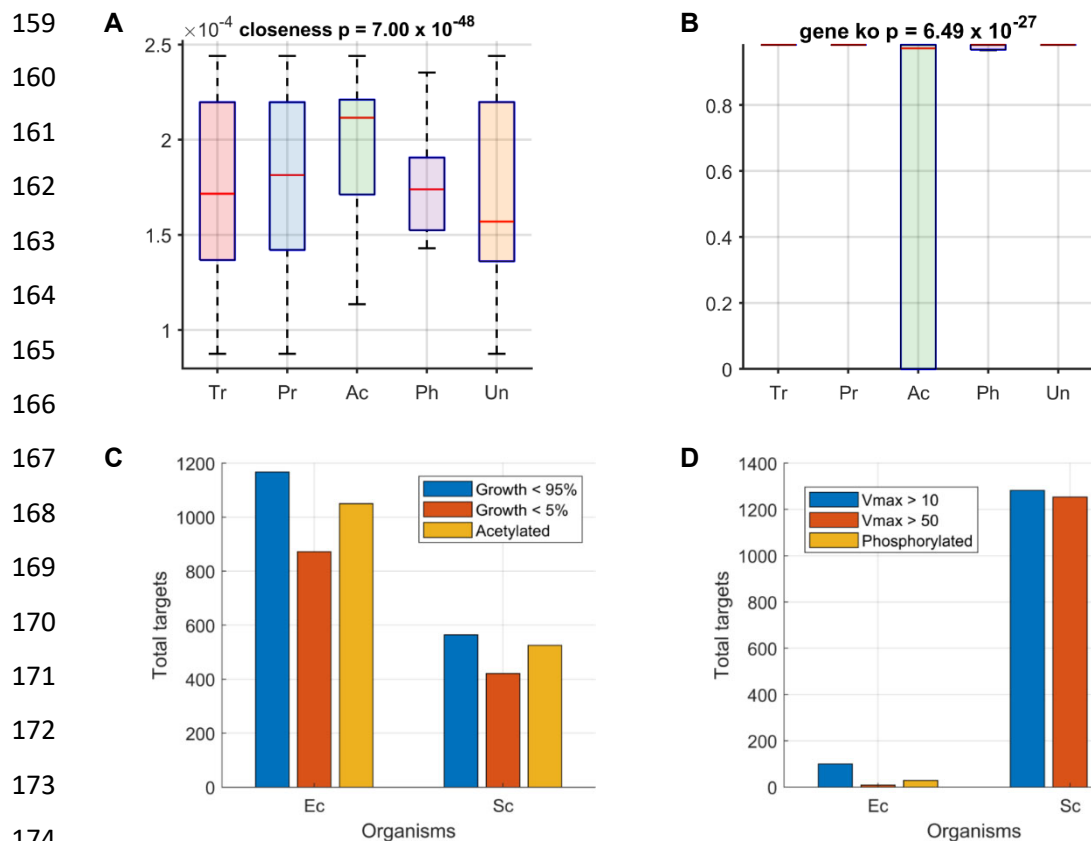

175 **Figure S7. Comparison of properties of enzymes in *E. coli* regulated by each mechanism, Related to Figure 2. A.**  
 176 Similar to yeast, enzymes that are highly connected (i.e. high closeness) are likely to be regulated. **B.** Similar to  
 177 our analysis in Figure 2A, which showed using the entire set of acetylated proteins the association between  
 178 acetylation regulation and growth impacting enzymes, this figure shows that the subset of acetylated proteins  
 179 regulated by the deacetylase *cobB* also show the same trend with reactions that impact growth when knocked out  
 180 are highly likely to be acetylated and regulated by *cobB*. The Anova p-value comparing the differences in means  
 181 is shown in the title. **C, D.** Comparison of total number of targets between species. Total number of regulation  
 182 targets (i.e. gene-reactions) of PTMs in *E. coli* (Ec) and yeast (Sc) are compared with those that have high Vmax  
 183 and are growth limiting in those species in the stationary phase condition.

184  
 185  
 186

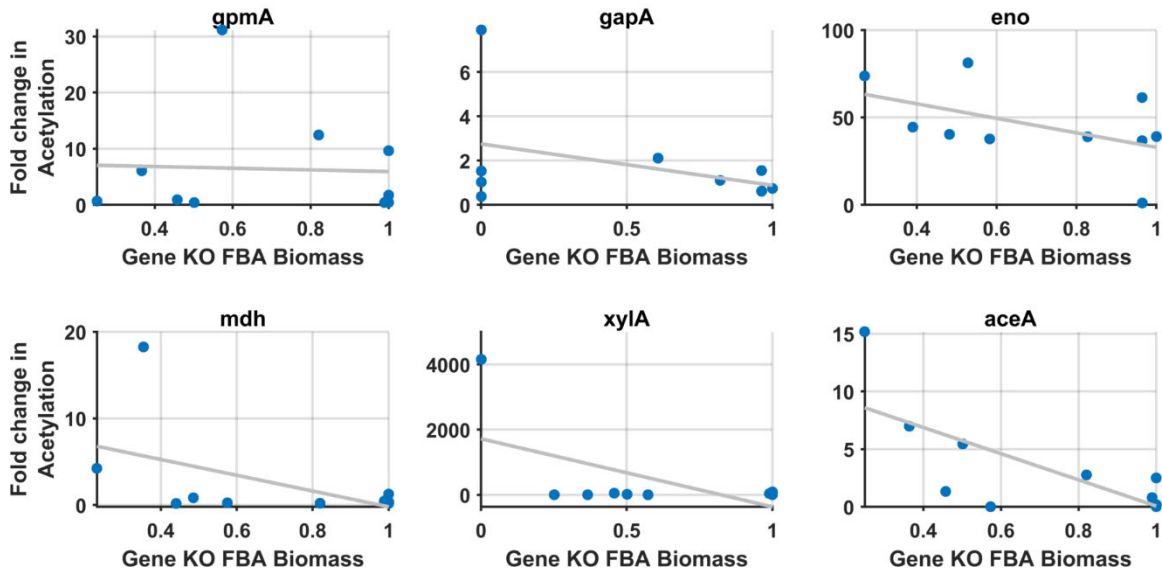

187

188

189 **Figure S8. Condition-specific essentiality is correlated with acetylation, Related to Figure 2.** The scatter plots  
 190 show the association between the impact of a gene knockout on biomass from FBA with the acetylation levels of  
 191 the corresponding protein in a given condition. On average, increased essentiality is associated with an increase  
 192 in acetylation. All proteins with at least 2 fold change in acetylation between conditions and are part of the  
 193 metabolic model are shown. The change in biomass relative to glucose is show in the x-axis. The correlations  
 194 were observed even when the total absolute acetylation levels were considered instead of relative levels to  
 195 proteins.

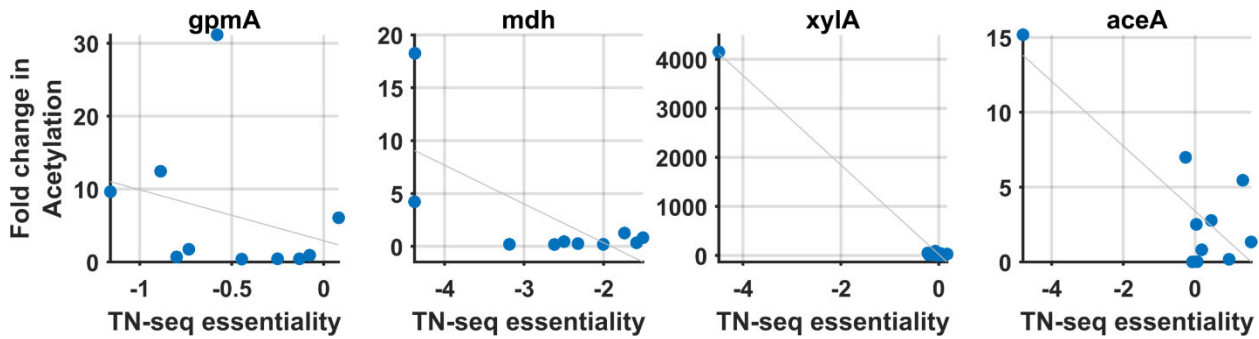

196

197

198 **Figure S9. Condition-specific essentiality from TN-seq is correlated with acetylation, Related to Figure 2.** The  
 199 scatter plots show the association between the impact of a gene knockout on viability from Transposon  
 200 mutagenesis screens with the acetylation levels of the corresponding protein in a given condition. All proteins in  
 201 the metabolic model with available TN-seq data and acetylation data across conditions from Schmidt et al study  
 202 are shown. Although FBA made false positive growth predictions for some enzymes such as XylA (Figure S8), our  
 203 results were observed even with experimentally derived knockout screens, suggesting that this link between  
 204 essentiality and acetylation is robust.

205

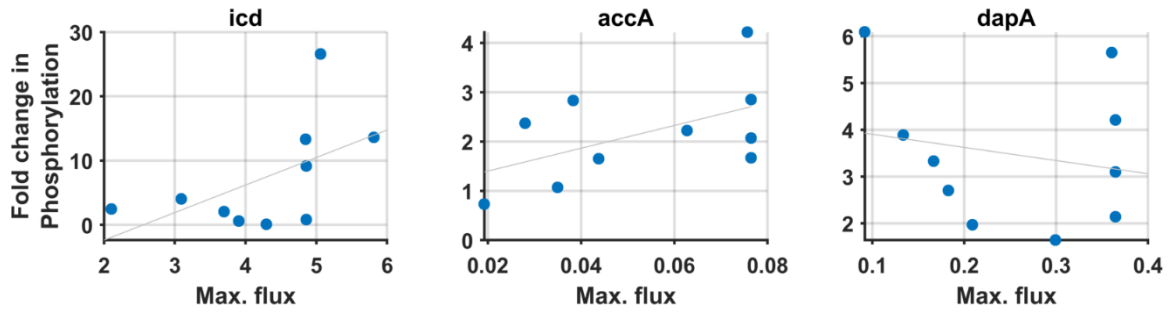

206

207

208 [Figure S10. Correlation between maximum flux and phosphorylation levels \(normalized to glucose\), Related to](#)  
 209 [Figure 2.](#) All proteins that showed at least 2-fold change in phosphorylation levels between conditions are shown.  
 210 This trend was observed with both the total phosphorylation levels and relative levels normalized to proteins.  
 211 While in most cases a change in maximal flux or essentiality resulted in a change in regulation by PTMs (Figure  
 212 2F), there were exceptions. For example, *dapA* did not show this trend suggesting that other factors likely  
 213 influence regulation by PTMs in a combinatorial fashion.

214

215

216

217

218

219

220

221

222

223

224

225

226

227

228

229

230

231

232

233

234  
 235  
 236  
 237  
 238  
 239  
 240  
 241  
 242  
 243  
 244  
 245  
 246  
 247  
 248  
 249  
 250  
 251  
 252  
 253  
 254  
 255  
 256  
 257  
 258  
 259  
 260  
 261  
 262  
 263

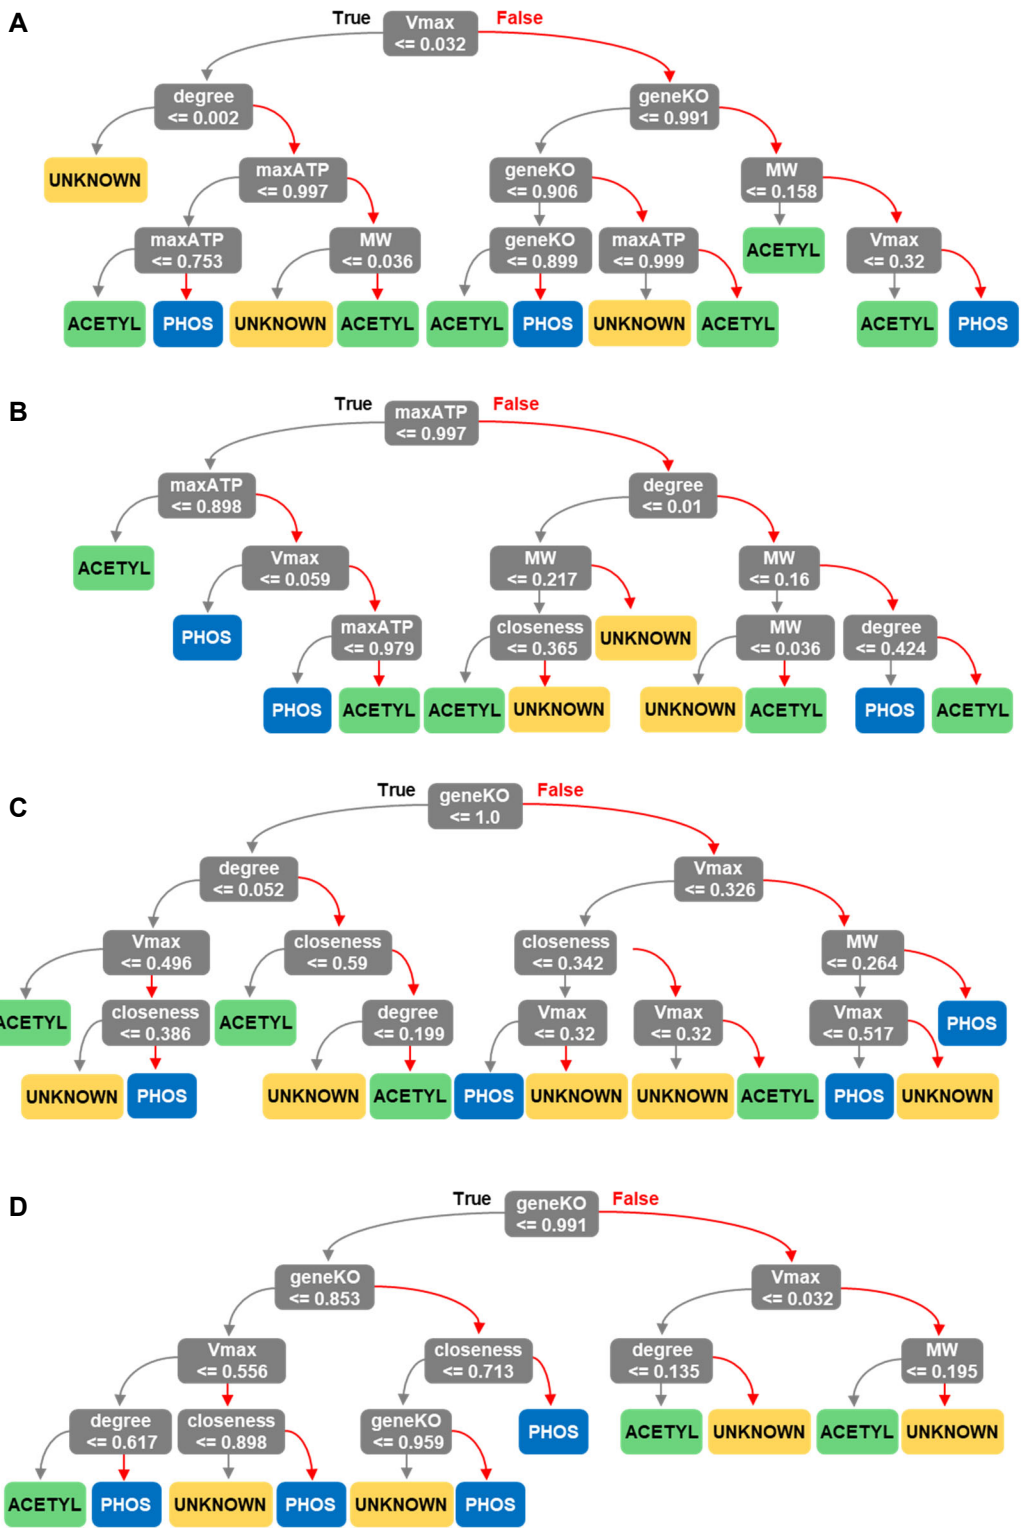

264 Figure S11. Representative decision trees with maximum depth of 4, Related to Figures 3-5. Single decision tree  
 265 models were trained for the multi-organism (A), *E. coli* (B), yeast (C), and mammalian (D) datasets. Only the top  
 266 50% most important features, as identified in the Shapley analysis, were used to train the trees.

267  
268  
269  
270  
271  
272  
273  
274  
275  
276  
277  
278  
279  
280  
281  
282  
283  
284  
285  
286  
287  
288  
289  
290  
291  
292  
293

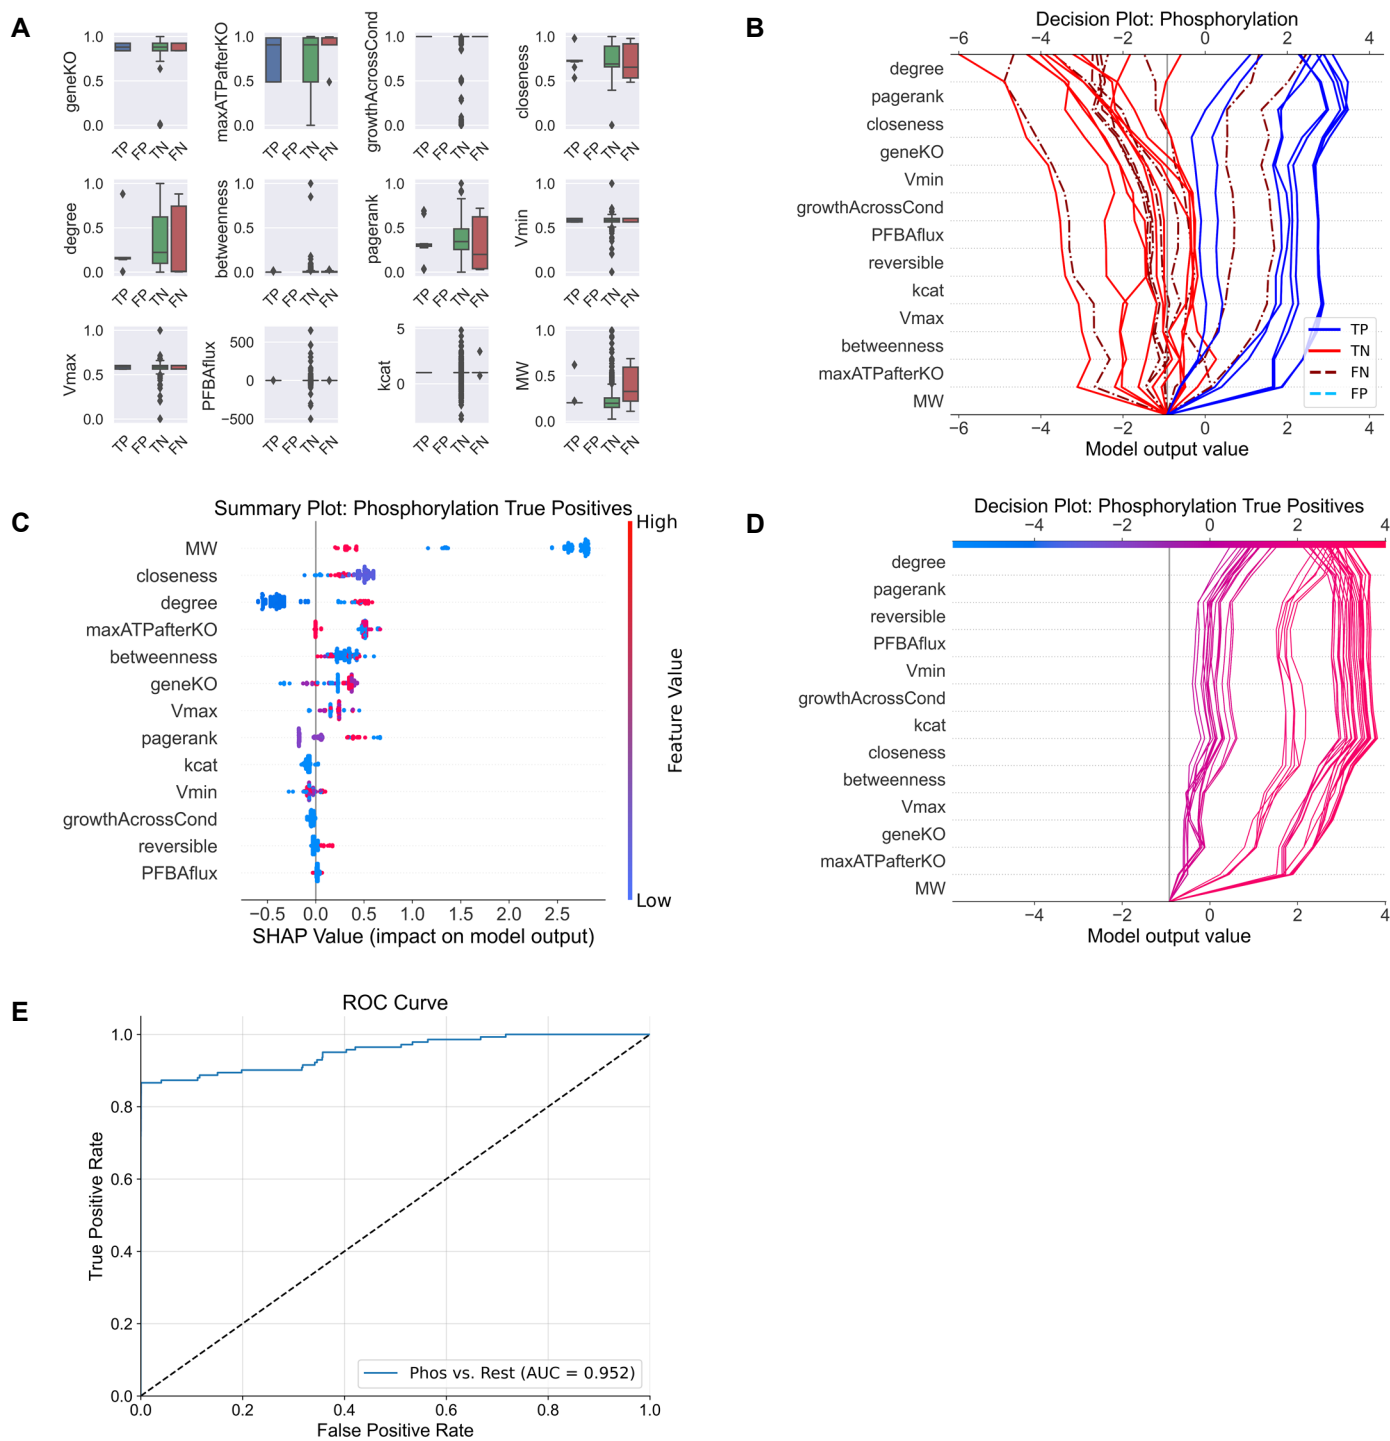

294 **Figure S12. Analysis of model predictions on the cell-cycle phosphorylation data, Related to Figures 3-5. A.**  
295 Feature distributions for phosphorylated gene-reaction pairs are compared between true positive (TP), true  
296 negative (TN) and false negative (FN) observations using boxplots. There were no false positives from this  
297 validation test. **B** SHAP decision plot was created for 50 random observations to compare trends between the  
298 classification groups. Values on the x-axis represent log odds of belonging to the phosphorylation class. **C** and **D.**  
299 The phosphorylated gene-reaction pairs that were correctly classified (true positives) are displayed in a SHAP  
300 summary plot (C) and decision plot (D). **E.** ROC curve for the model's phosphorylation predictions on the cell-  
301 cycle data.

302  
303  
304  
305  
306  
307  
308  
309  
310  
311  
312  
313  
314  
315  
316  
317  
318  
319  
320  
321  
322  
323  
324  
325  
326  
327  
328  
329  
330  
331  
332  
333  
334  
335

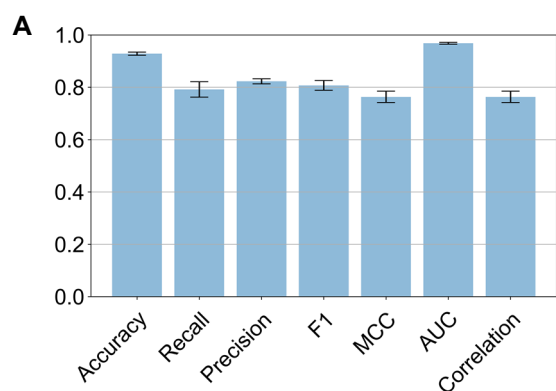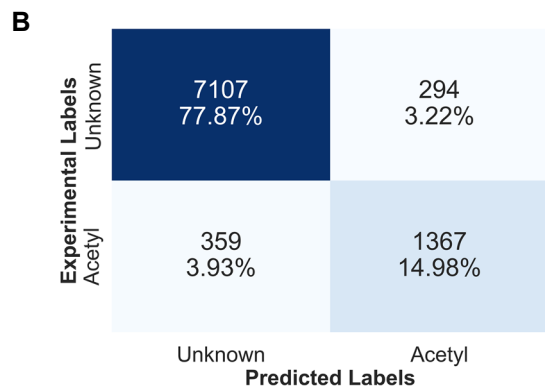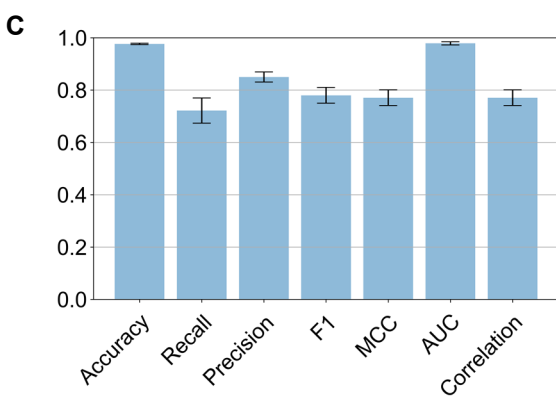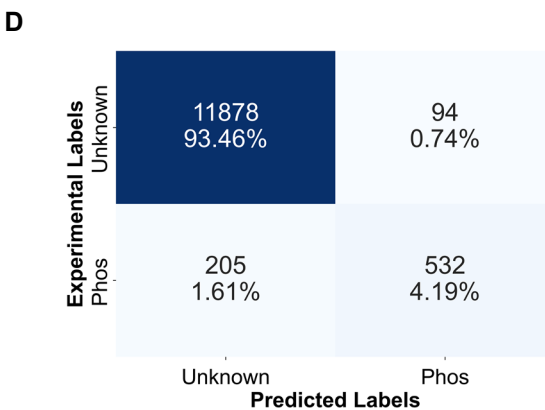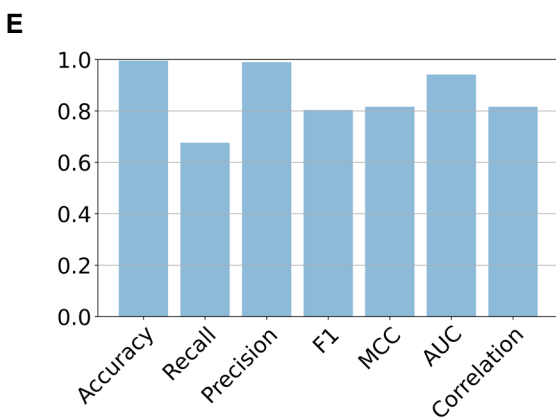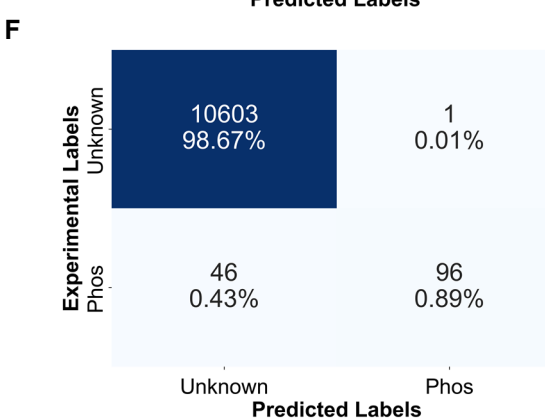

Figure S13. Binary classification models for predicting acetylation and phosphorylation separately, Related to Figures 3-5. The pipeline for training the models was identical to process used for the multi-class model. **A, B** The 5-fold cross-validation results for the acetylation model. **C, D**. The 5-fold cross-validation results for the phosphorylation model. **E, F**. The phosphorylation model was used to predict the cell-cycle validation dataset, which includes the G1, S and G2 phases. Overall, these results show that the ternary classification model outperforms the binary classification models.

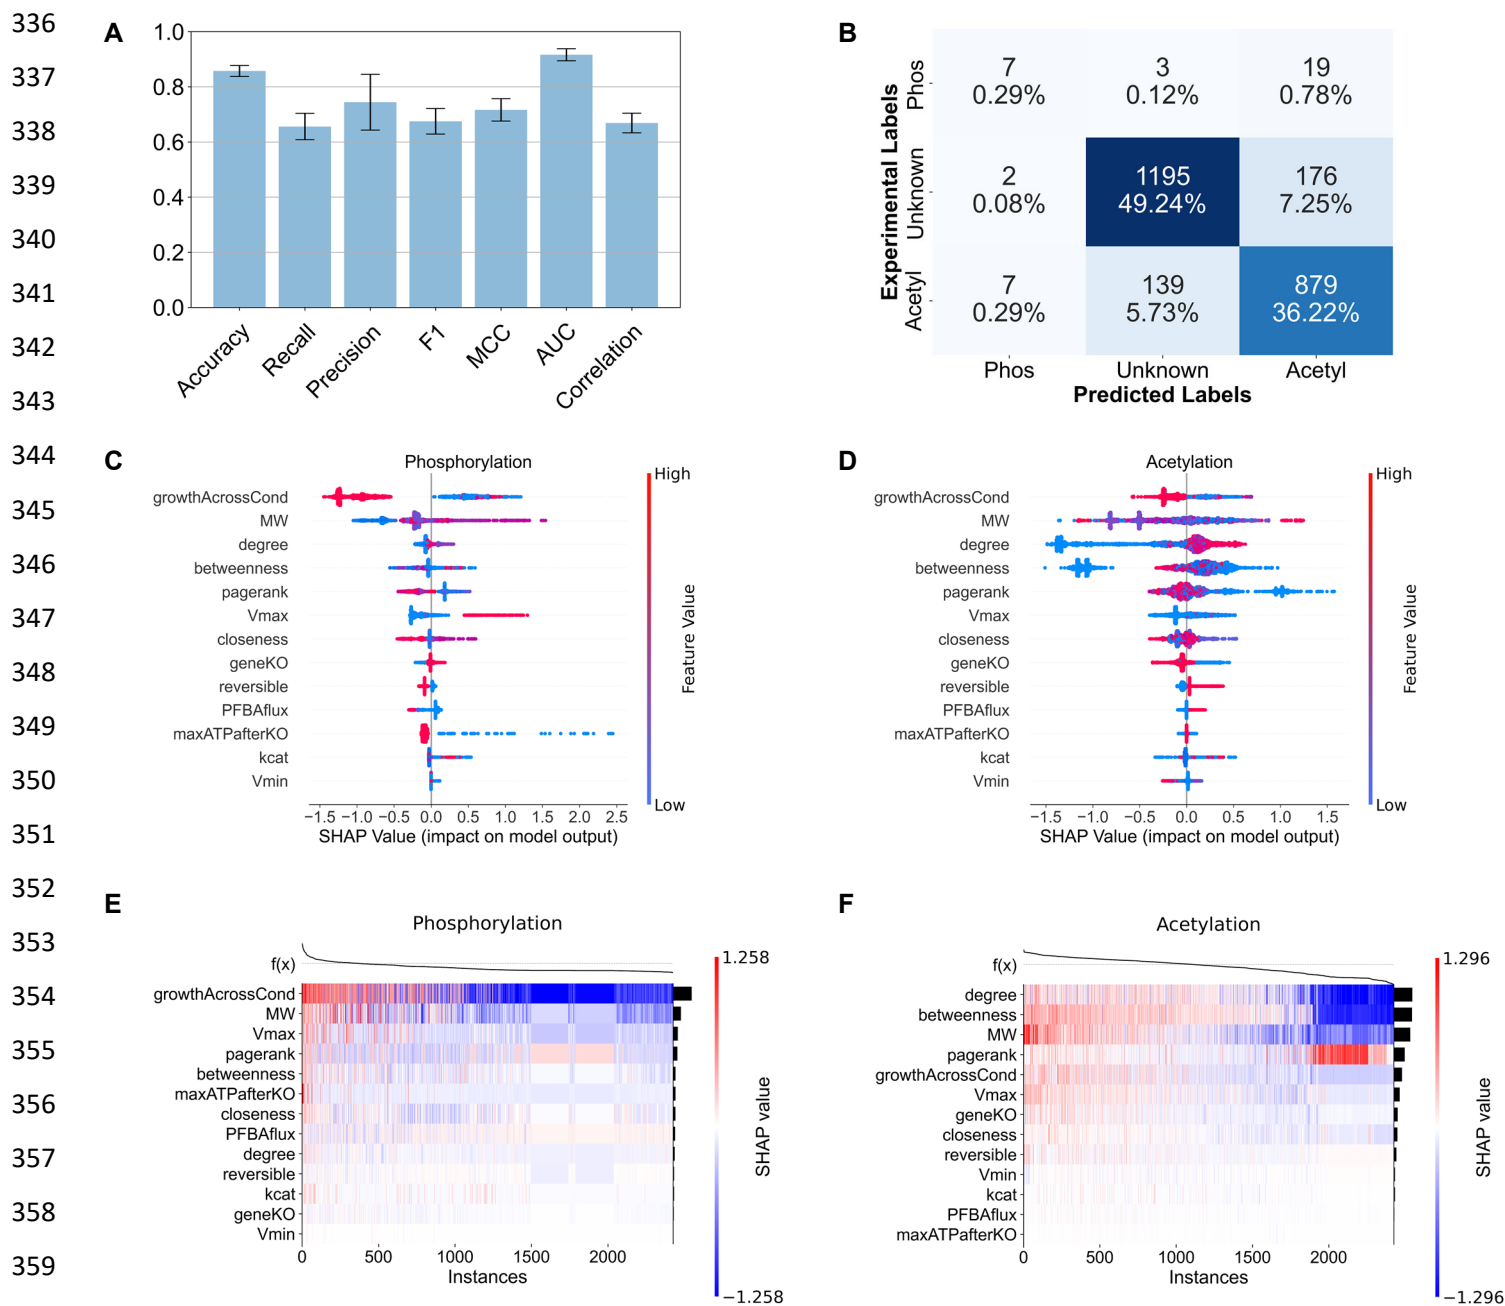

361 **Figure S14. Organism-specific ML models – E. coli, Related to Figures 3-5.** XGBoost model trained on the *E. coli*  
 362 dataset. **A, B.** 5-fold cross-validation results. Bar graph shows the mean scores across the 5 folds with a 95%  
 363 confidence interval. **C, D.** SHAP value summary plots for the phosphorylation and acetylation classes. **E, F.** SHAP  
 364 value heatmaps for the phosphorylation and acetylation classes. Observations are clustered by the model output,  
 365  $f(x)$ .

366  
367  
368



369  
370  
371  
372  
373  
374  
375  
376  
377  
378  
379  
380  
381  
382  
383  
384  
385  
386  
387  
388  
389  
390  
391  
392  
393  
394  
395  
396  
397  
398  
399  
400  
401

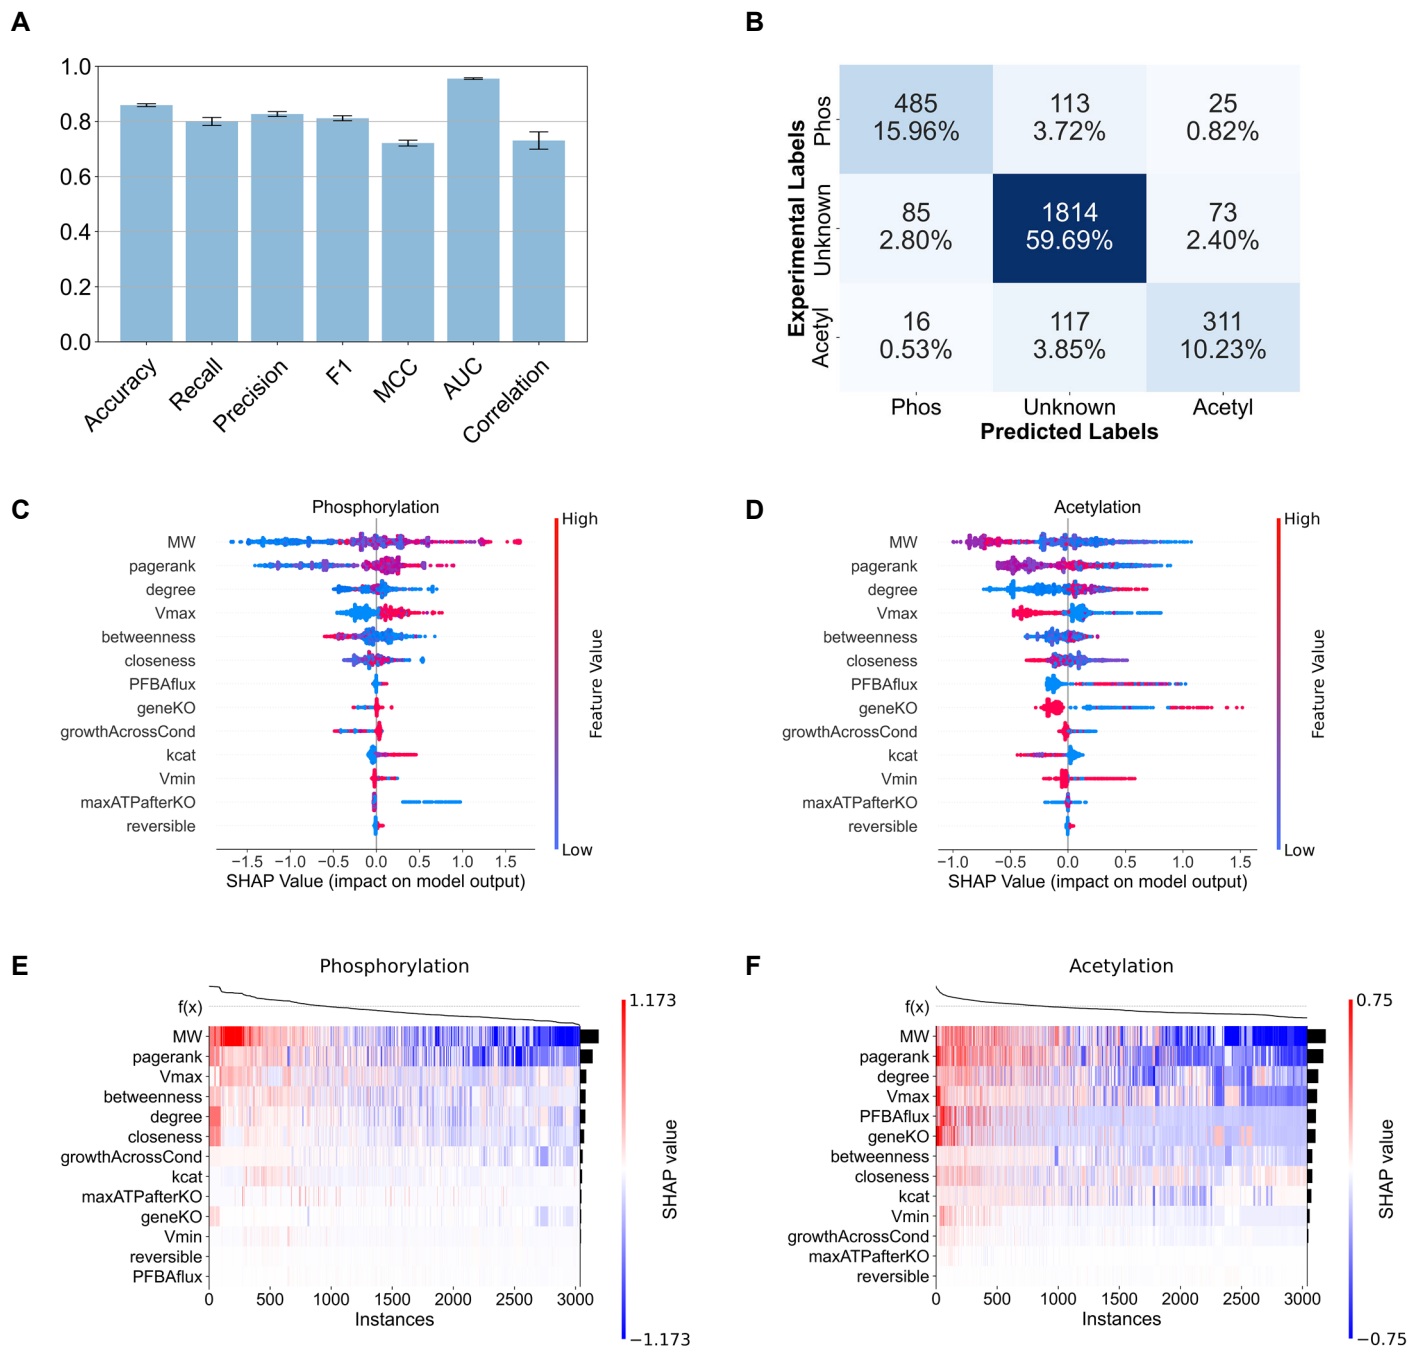

Figure S15. Organism-specific ML models – *S. cerevisiae*, Related to Figures 3-5. XGBoost model trained on the yeast dataset. **A**, **B**. 5-fold cross-validation results. Bar graph shows the mean scores across the 5 folds with a 95% confidence interval. **C**, **D**. SHAP value summary plots for the phosphorylation and acetylation classes. **E**, **F**. SHAP value heatmaps for the phosphorylation and acetylation classes.



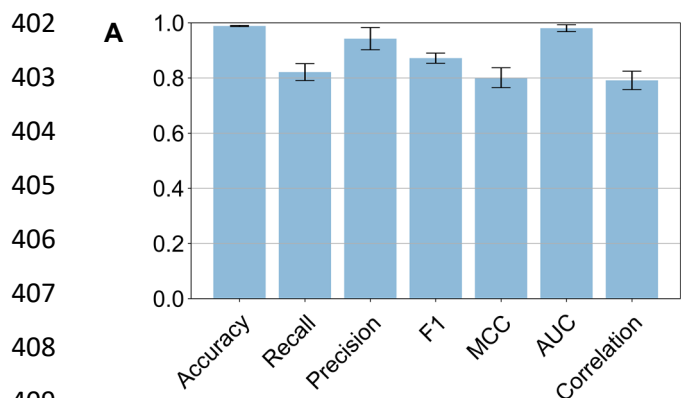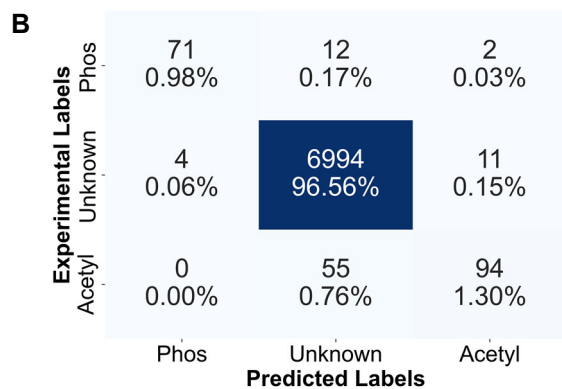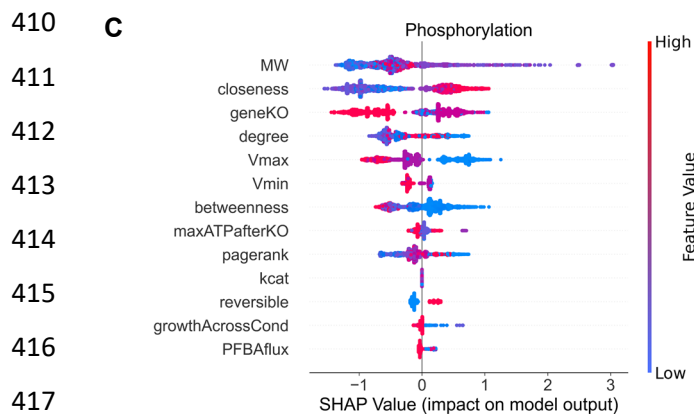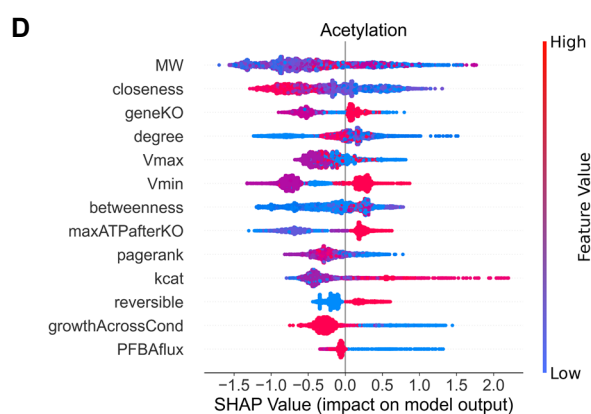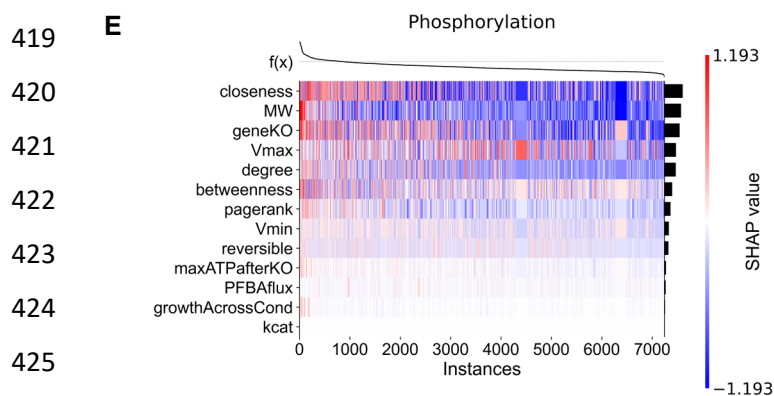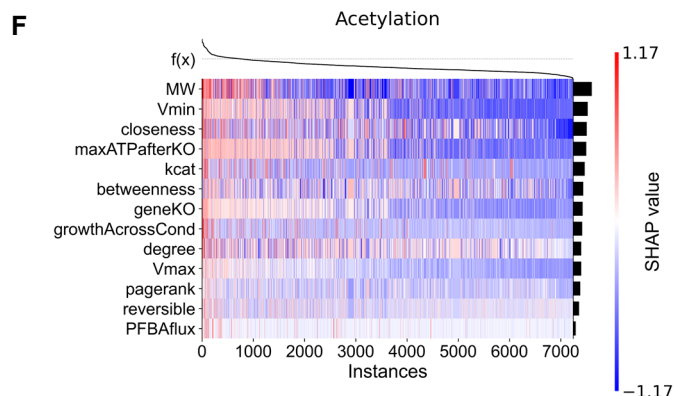

427 **Figure S16. Organism-specific ML models – mammalian cells, Related to Figures 3-5.** XGBoost model trained on  
 428 the mammalian dataset. **A, B.** 5-fold cross-validation results. Bar graph shows the mean scores across the 5 folds  
 429 with a 95% confidence interval. **C, D.** SHAP value summary plots for the phosphorylation and acetylation classes.  
 430 **E, F.** SHAP value heatmaps for the phosphorylation and acetylation classes.

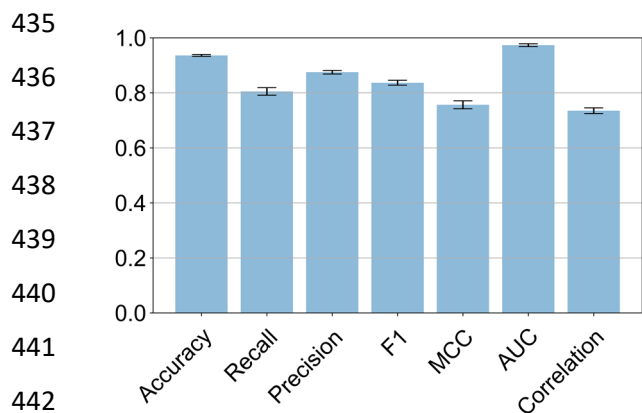

| Experimental Labels | Predicted Labels |                 |               |
|---------------------|------------------|-----------------|---------------|
|                     | Phos             | Unknown         | Acetyl        |
| Phos                | 530<br>3.54%     | 161<br>1.07%    | 46<br>0.31%   |
| Unknown             | 66<br>0.44%      | 12330<br>82.29% | 233<br>1.55%  |
| Acetyl              | 18<br>0.12%      | 435<br>2.90%    | 1165<br>7.77% |

Figure S17. Impact of including organism type in the ML model, Related to Figures 3-5. 5-fold cross-validation results for XGBoost model with organism-type included in the training data. Bar graph shows the mean scores across the 5 folds with a 95% confidence interval. The organism type was added as a categorical array where a 1 designated *E. coli*, 2 for yeast and 3 for human. The cross-validation results were extremely consistent with those from the primary model, suggesting that the model's decision-making is not influenced by organism type

443  
444  
445  
446  
447  
448  
449  
450  
451  
452  
453  
454  
455  
456  
457  
458  
459  
460  
461  
462  
463  
464  
465  
466  
467

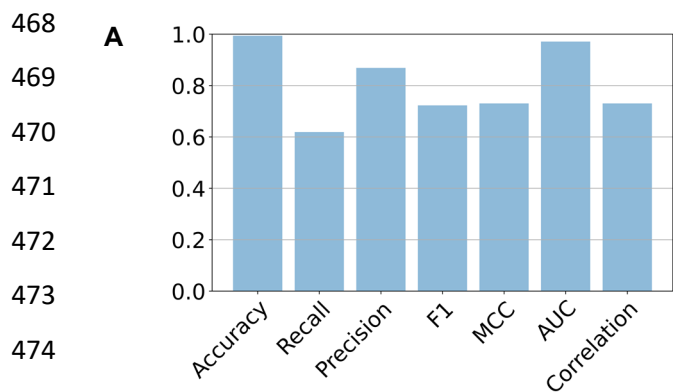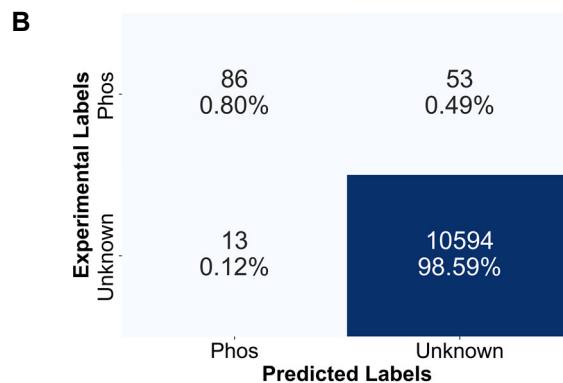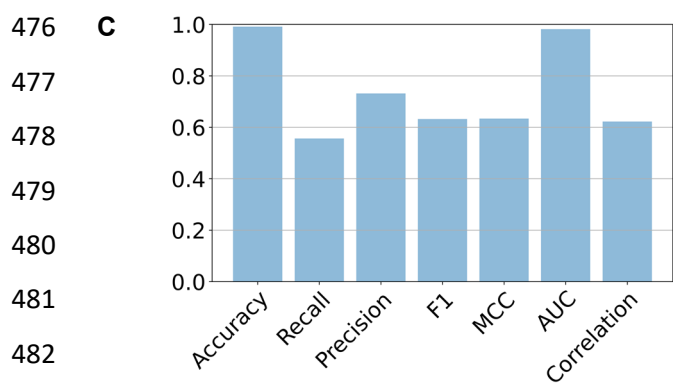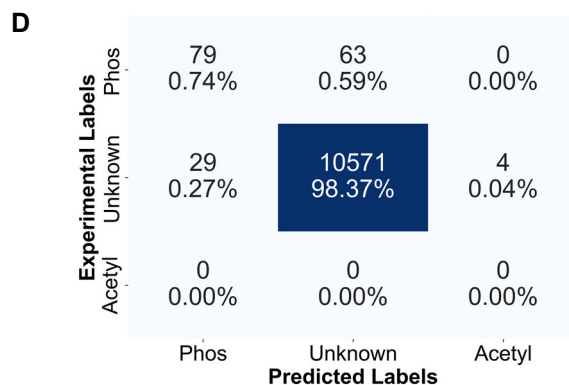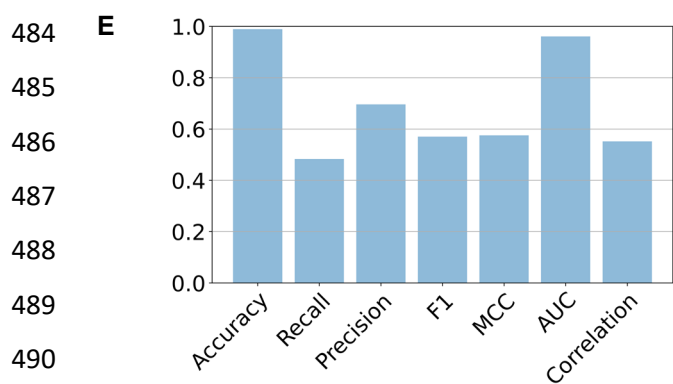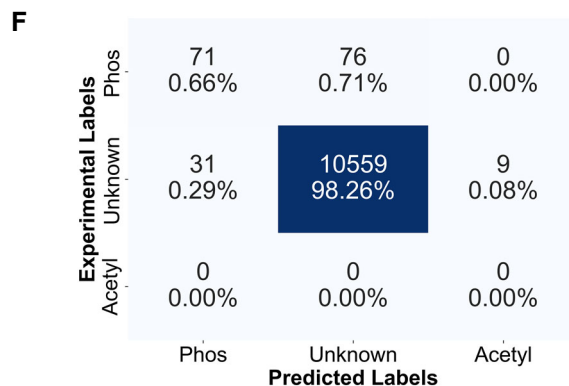

491 **Figure S18. Impact of training on different phases of the cell cycle, Related to Figures 3-5.** Models were trained by  
492 replacing the G0 cell-cycle data from the training set with the feature matrix from the remaining phases: G1, S,  
493 and G2. Each model was then used to predict the phosphorylated genes from the phases not featured in the  
494 training. These results are shown here for the G1-model (**A, B**), S-model (**C, D**) and G2-model (**E, F**). All three  
495 models, especially for S and G2, performed inferior to the primary CAROM-ML model in regard to this validation  
496 test. These results suggest that S and G2 conditions have a distinct phosphorylation pattern from the remaining  
497 conditions.

498

499

500

501

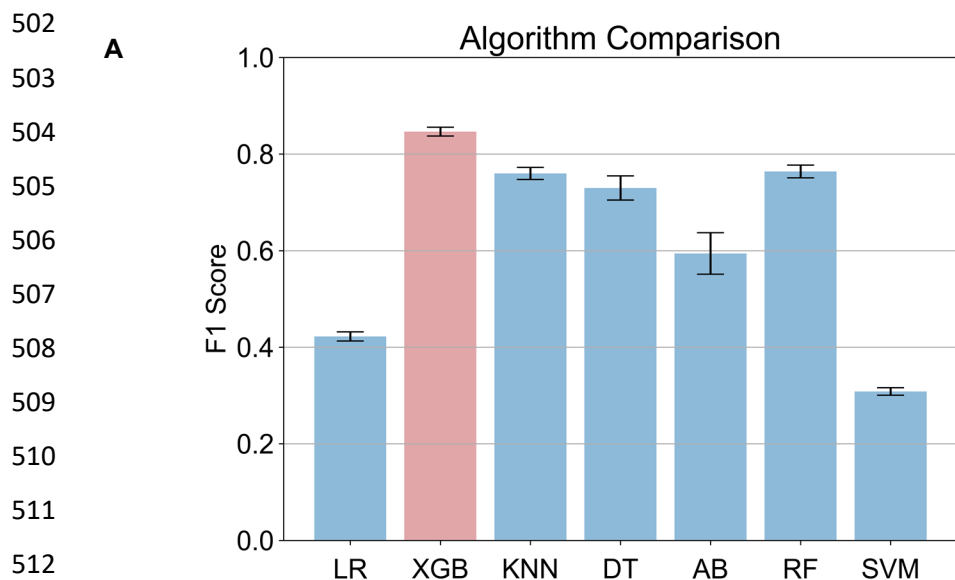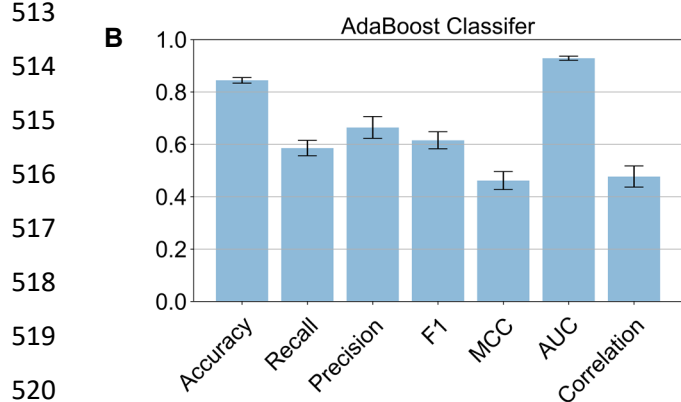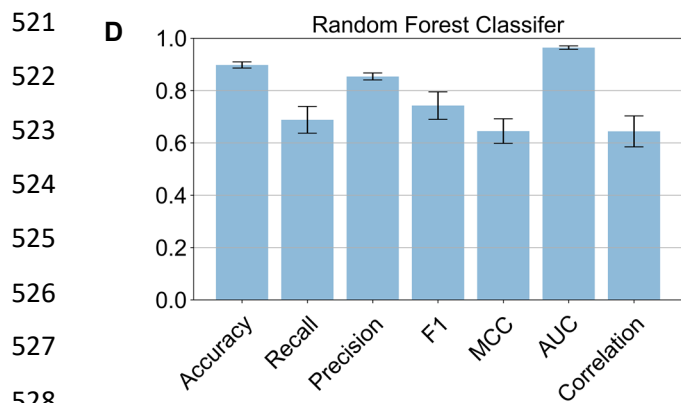

**C**

| Experimental Labels | Predicted Labels |                |              |
|---------------------|------------------|----------------|--------------|
|                     | Phos             | Unknown        | Acetyl       |
| Phos                | 220<br>1.73%     | 483<br>3.80%   | 34<br>0.27%  |
| Unknown             | 228<br>1.79%     | 9660<br>76.01% | 466<br>3.67% |
| Acetyl              | 19<br>0.15%      | 748<br>5.89%   | 851<br>6.70% |

**E**

| Experimental Labels | Predicted Labels |                 |               |
|---------------------|------------------|-----------------|---------------|
|                     | Phos             | Unknown         | Acetyl        |
| Phos                | 341<br>2.68%     | 354<br>2.79%    | 42<br>0.33%   |
| Unknown             | 54<br>0.42%      | 10047<br>79.05% | 253<br>1.99%  |
| Acetyl              | 3<br>0.02%       | 593<br>4.67%    | 1022<br>8.04% |

529 **Figure S19. CAROM-ML model performance using various ML algorithms, Related to Figures 3-5.** 5-fold cross-  
530 validation results were compared for various untuned algorithms, with F1 score used as the metric **(A)**. XGBoost,  
531 colored in red, had the best performance and was therefore used for the main CAROM-ML model. AdaBoost **(B,**  
532 **C)** and random forest **(D, E)** models were further tested by tuning their hyperparameters and performing 5-fold  
533 cross-validation. For all bar graphs, the mean scores across the 5 folds are shown with a 95% confidence interval.

535  
536  
537  
538  
539  
540  
541  
542  
543  
544  
545  
546  
547  
548  
549  
550  
551  
552  
553  
554  
555  
556  
557  
558  
559  
560  
561  
562  
563  
564  
565  
566  
567  
568  
569

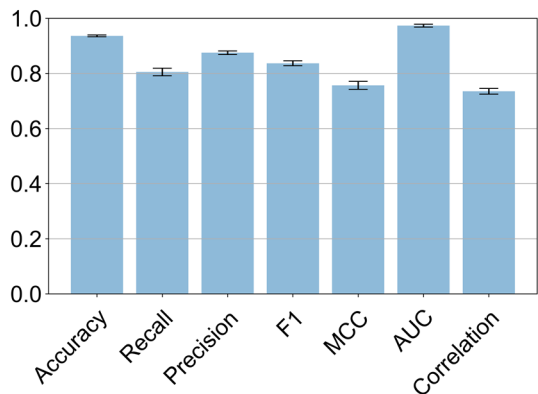

| Experimental Labels | Predicted Labels |                               |               |
|---------------------|------------------|-------------------------------|---------------|
|                     | Phos             | Unknown                       | Acetyl        |
| Phos                | 530<br>3.54%     | 161<br>1.07%                  | 46<br>0.31%   |
| Unknown             | 66<br>0.44%      | <b>12330</b><br><b>82.29%</b> | 233<br>1.55%  |
| Acetyl              | 18<br>0.12%      | 435<br>2.90%                  | 1165<br>7.77% |

Figure S20. Impact of retaining genes that do not have evidence for phosphorylation or acetylation Related to Figures 3-5. 5-fold cross-validation results for model trained on full set of genes is shown. Bar graph shows the mean scores across the 5 folds with a 95% confidence interval. For the main CAROM-ML model, online databases were used to compile a list of enzymes that have been found to be phosphorylated or acetylated in published studies. Non-annotated enzymes were removed from the training data. Here we show the results for the model which had these non-annotated enzymes included in the training data did not differ from the model with these genes removed during the model construction.

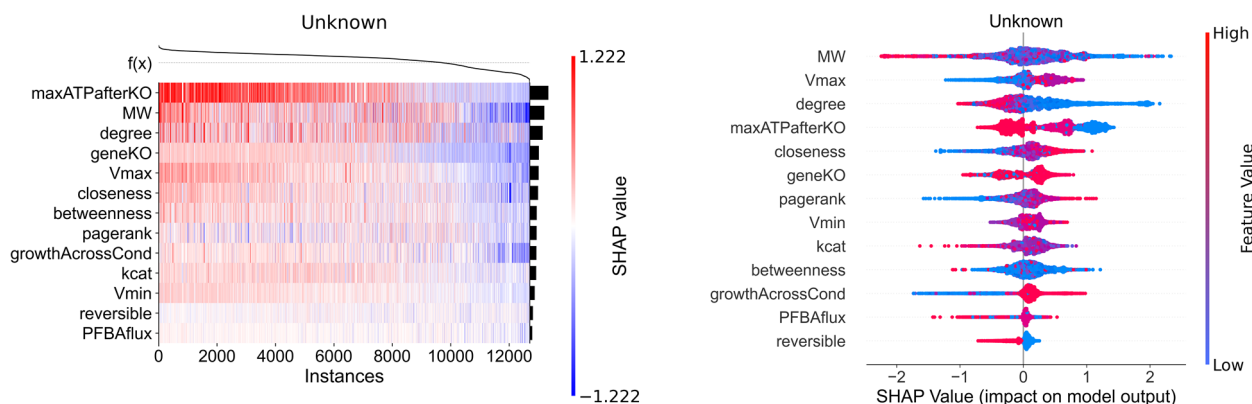

Figure S21. Interpretation of the CAROM-ML model using Shapley analysis: Unknown class, Related to Figures 3-5. Corresponding plots for the phosphorylation and acetylation classes are shown in Figure 4 in the main text.

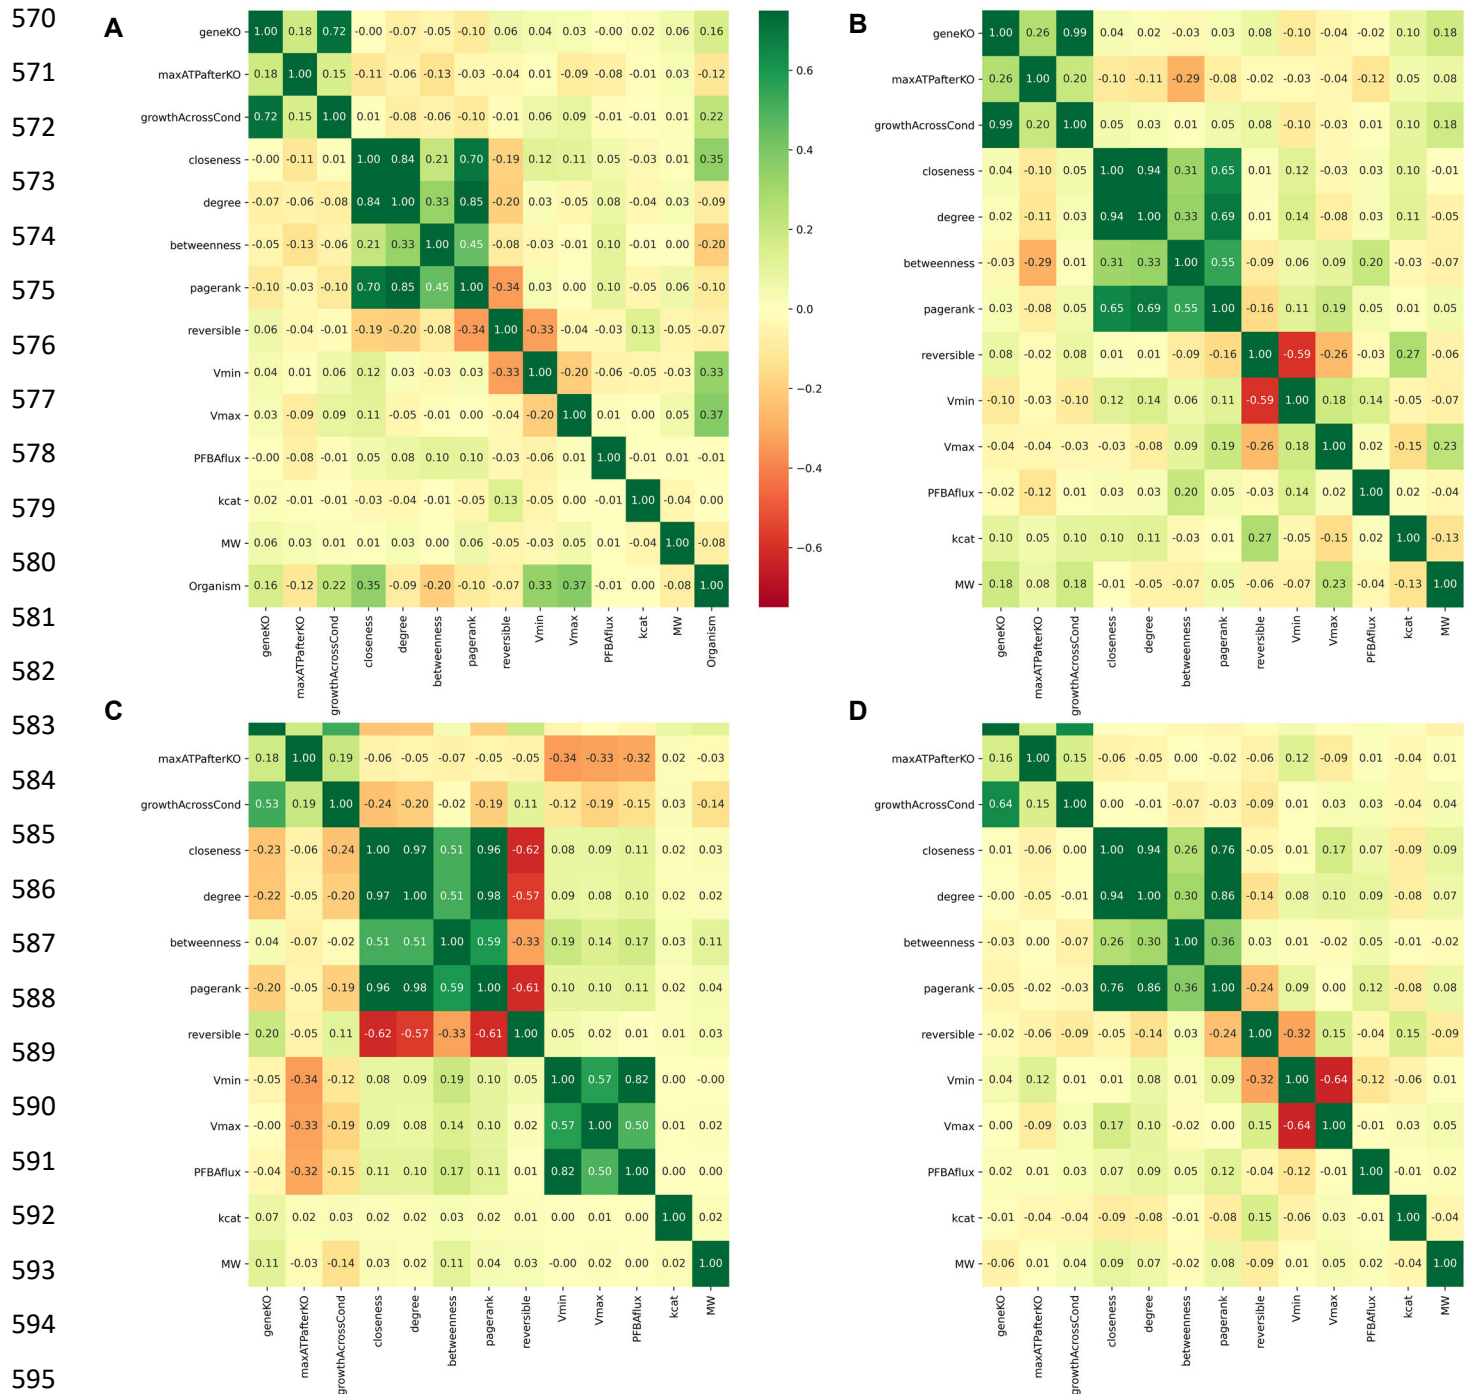

Figure S22. Correlation map of all model features, Related to Figures 3-5. Heatmap of Pearson's correlation between feature values for the following datasets: all organism types (A), yeast (B), *E. coli* (C), and human (D).

602

603

604

605

606

607

608

609

610

611

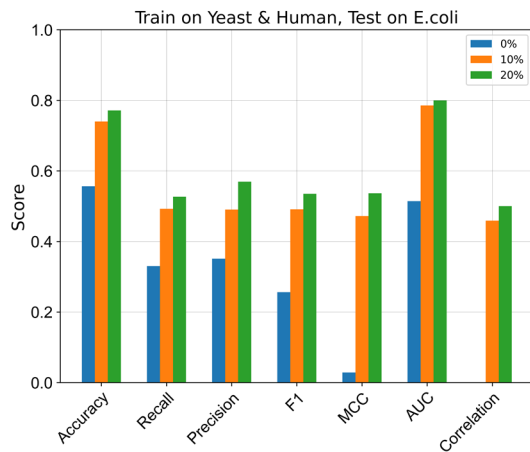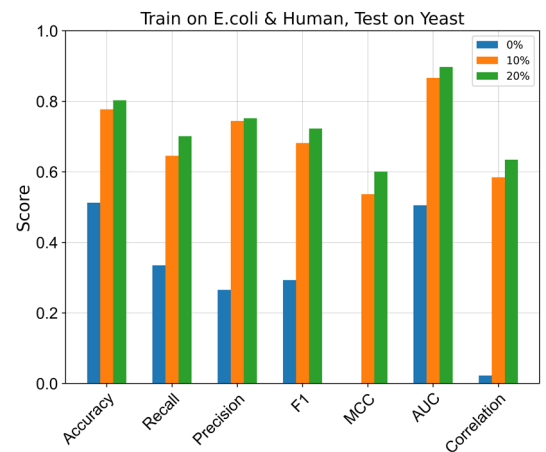

612

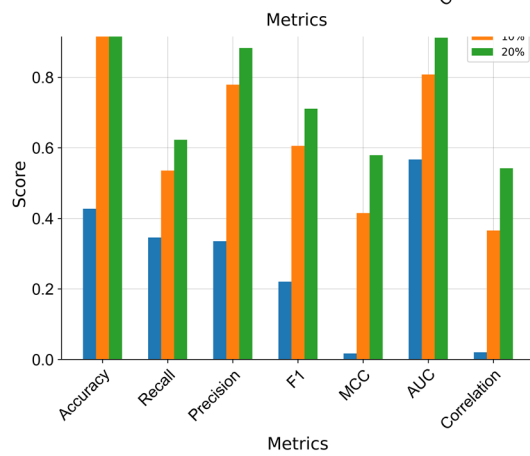

619

620 **Figure S23. Predicting on unseen organisms, Related to Figures 3-5.** XGBoost models were trained on the data  
 621 from two organisms and used to make predictions on the third (e.g. train on E. coli and yeast, test on  
 622 mammalian). Data from the test organism was moved to the training data in increments of 0%, 10% and 20%.  
 623 Model performance improved significantly after including a small number of samples from the test organism in the  
 624 training dataset.

625

626

627

628

629

630

631

632

633

634



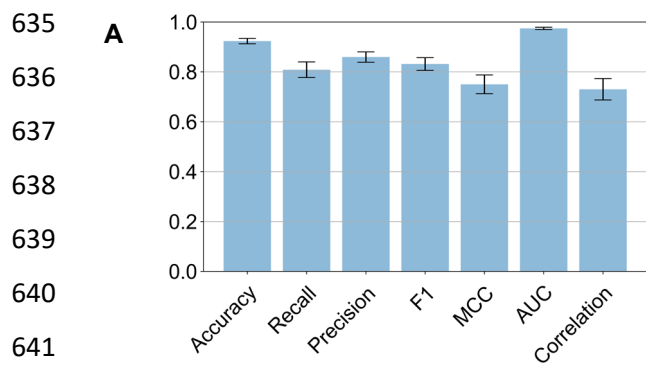

| Experimental Labels | Predicted Labels |                |               |
|---------------------|------------------|----------------|---------------|
|                     | Phos             | Unknown        | Acetyl        |
| Phos                | 522<br>4.11%     | 159<br>1.25%   | 56<br>0.44%   |
| Unknown             | 81<br>0.64%      | 9995<br>78.65% | 278<br>2.19%  |
| Acetyl              | 15<br>0.12%      | 386<br>3.04%   | 1217<br>9.58% |

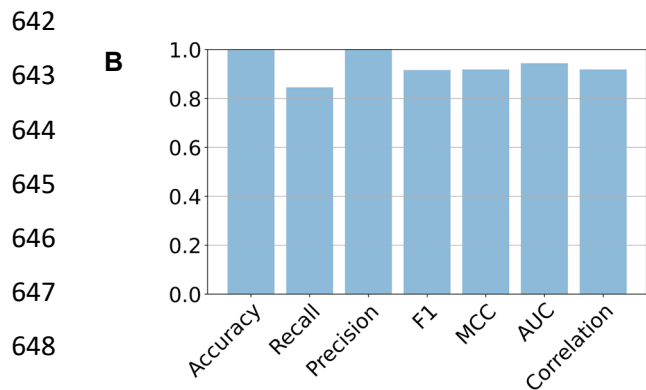

| Experimental Labels | Predicted Labels |                 |
|---------------------|------------------|-----------------|
|                     | Phos             | Unknown         |
| Phos                | 120<br>1.12%     | 22<br>0.20%     |
| Unknown             | 0<br>0.00%       | 10604<br>98.68% |

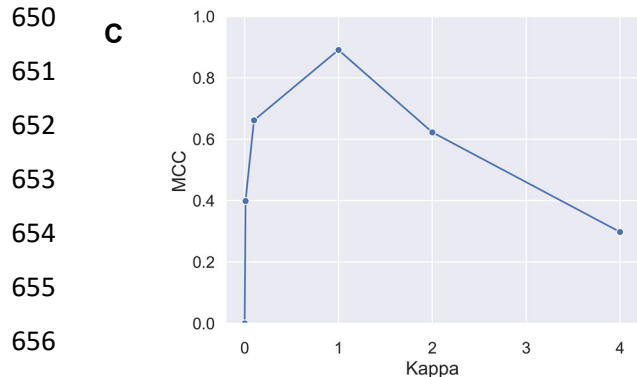

657 **Figure S24. Impact of adjusting flux-related feature parameters on the ML results, Related to Figures 3-5.** For the  
 658 ML analysis, the Vmax and Vmin features were constrained to magnitudes below 100 in order to reduce the effect of  
 659 unconstrained reactions and the variability across organism types. Here we show that the CAROM-ML model is  
 660 robust to increasing the threshold to the 900 mmol/gDW/hr value used for the ANOVA testing. A supplementary  
 661 model was trained on the *E. coli*, yeast, HeLa and G0 phase data after adjusting this threshold. **A.** Results from  
 662 training the model using 5-fold cross-validation. Bar graph shows the mean scores across the 5 folds with a 95%  
 663 confidence interval. **B.** The model was used to predict on the cell cycle validation dataset, which includes the G1,  
 664 S and G2 phases. **C.** The cell cycle metabolic models were generated using dynamic flux analysis (DFA) with a  
 665 default value of 1 for kappa, the optimization weight that is applied to the metabolomics data relative to the  
 666 biomass objective. Changes to kappa therefore affect the flux- and growth-related features. The ML model's  
 667 performance on the cell cycle dataset was fairly robust as kappa was incrementally changed from 1e-3 to 4,  
 668 however the default value of 1 provided the best results. Setting it 0 or very low values results in the model not  
 669 learning any differences between the cell cycle phases as expected. At very high values, the DFA model overfits  
 670 to the metabolomics and is affected by noise in the measurement. The default value of 1 provides a good trade off  
 671 in separating signal from noise.



672

A

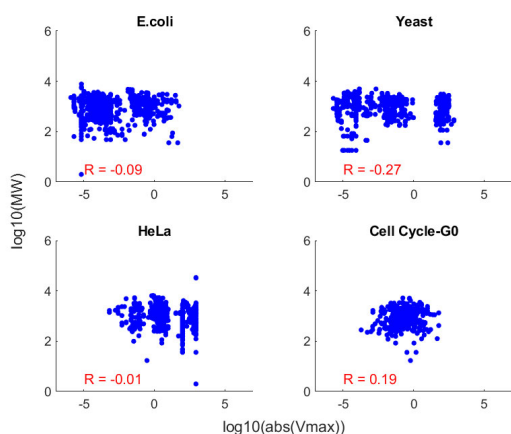

673

B

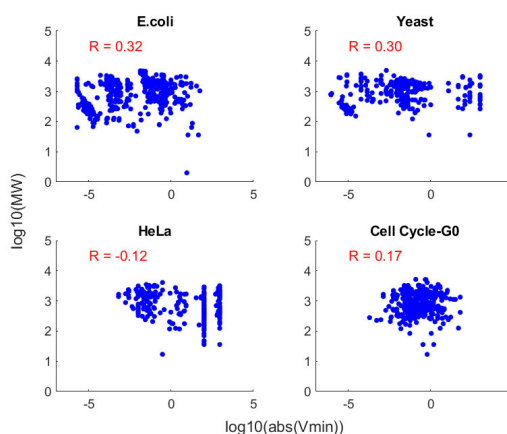

C

Vmax/min Adjusted for MW

|         |              |                 |            |
|---------|--------------|-----------------|------------|
| Acetyl  | 102<br>0.95% | 41<br>0.38%     | 0<br>0.00% |
| Phos    | 40<br>0.37%  | 10478<br>97.51% | 0<br>0.00% |
| Unknown | 0<br>0.00%   | 85<br>0.79%     | 0<br>0.00% |
|         | Acetyl       | Phos            | Unknown    |

Accuracy=0.985  
Precision=0.569  
Recall=0.570  
F1 Score=0.569  
MCC=0.562

674

675 **Figure S25. Relationship between flux and MW per reaction, Related to Figures 3-5.** Here we address whether  
 676 the flux features generated from flux variability analysis,  $V_{max}$  and  $V_{min}$ , are strongly correlated with the  
 677 molecular weight (MW) of the metabolites present in the corresponding reactions. We did not find a significant  
 678 correlation between MW of the metabolites and the predicted fluxes. For this analysis, “MW” represents the sum  
 679 of MW for all metabolites in a given reaction. The plots show the relationships between **(A)**  $V_{max}$  vs. MW and **(B)**  
 680  $V_{min}$  vs. MW for each organism on log scales. The Spearman’s correlation shown on each plot suggest there is  
 681 not a consistent relationship between flux and the MW present in a given reaction. While a negative correlation is  
 682 expected, in some cases we see a positive correlation. This suggests that there is not a strong relationship  
 683 between the two. **C.** A separate XGBoost model was trained after adjusting the  $V_{max}/min$  features for the MW per  
 684 reaction by multiplying the fluxes with the MW. The model’s performance slightly worsened compared to the main  
 685 CAROM-ML model.

686

687

688

689

690

691

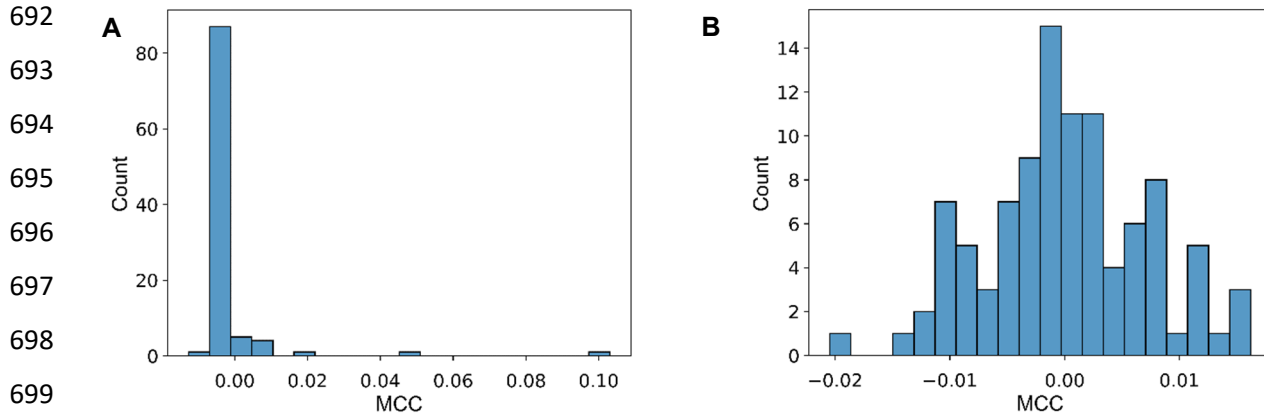

700 [Figure S26. Random permutation models as benchmark for the CAROM-ML model, Related to Figures 3-5.](#) We  
 701 generated 100 random permutations of the class labels for the CAROM-ML training dataset. The models  
 702 generated with these permutations achieved scores close to  $MCC=0$ , as expected for a random model. **A.** For  
 703 each permutation, an XGBoost model was trained using the CAROM-ML feature dataset and the shuffled class  
 704 labels, then used to predict on the cell cycle G1/S/G2 dataset. **B.** For each permutation, a subset of the shuffled  
 705 class labels from the training dataset was used to guess the G1/S/G2 class labels.

706

707

708

709
